# Supplementary material
Source: Springer Nature journal article supplement (https://www.springermedizin.de/resource/supplementary/12931_2012_1288_MOESM2_ESM.pdf/9425722)

**A**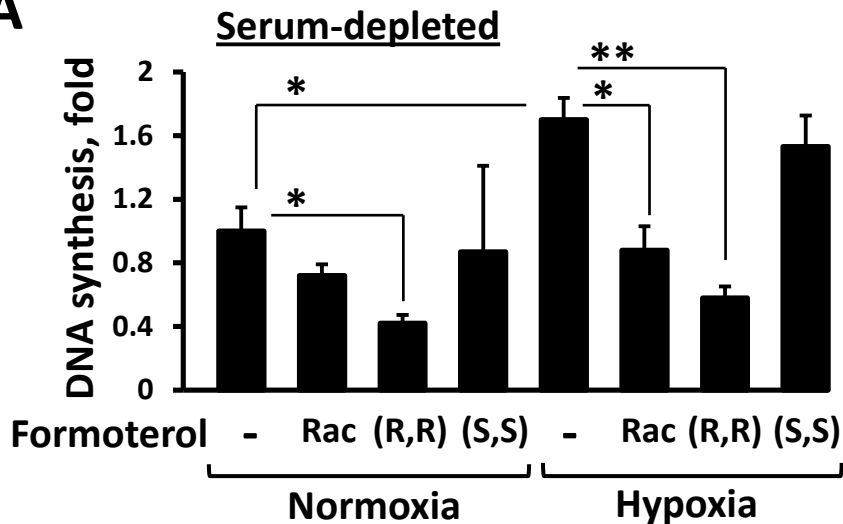**B**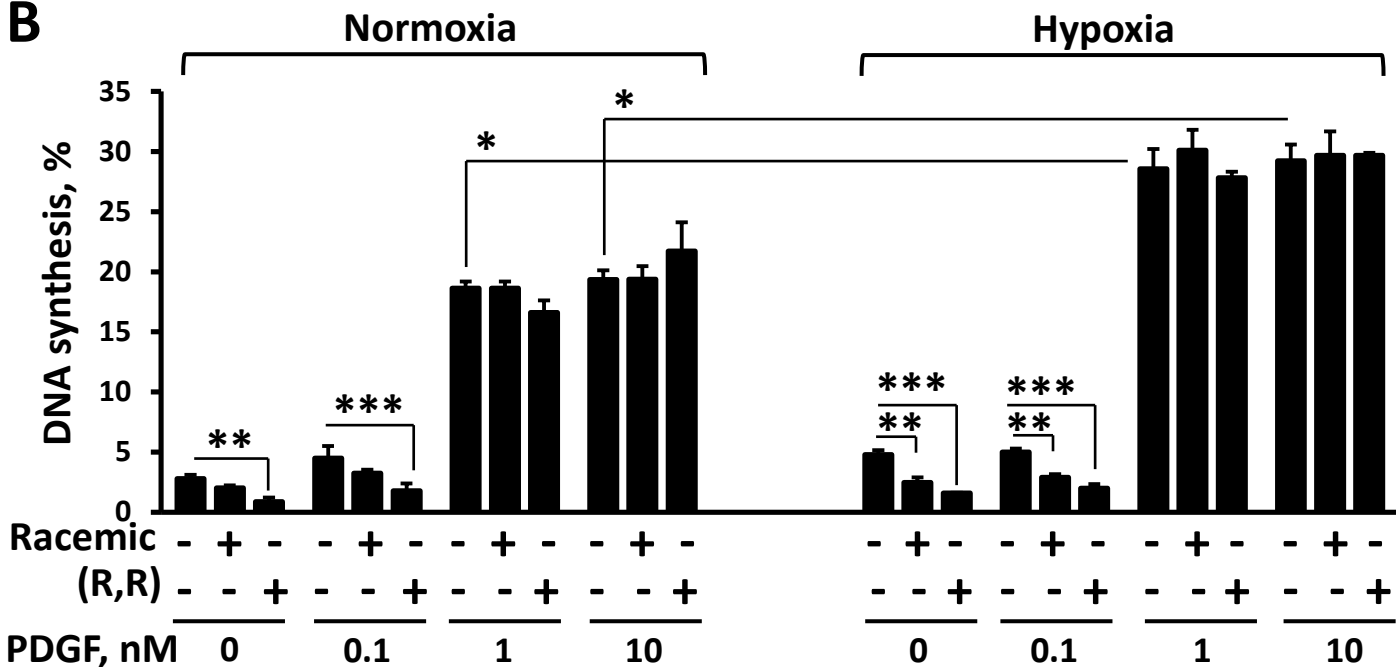

Supplement: MOESM2 [file 9425722]
